# Supplementary material
Source: MDPI journal article supplement (https://www.mdpi.com/2073-4441/15/6/1221)

**Supplementary Materials to**  
**Water-energy nexus in the Antofagasta mining district: options for municipal wastewater reuse from a**  
**nearly energy-positive WWTP**

**G. Campo, B. Ruffino, A. Reyes, M. Zanetti**

**SM Table S1. Nomenclature ASM3**

| <b>Parameters</b>                                                                                              |
|----------------------------------------------------------------------------------------------------------------|
| <b>ASM 3</b> = Activated sludge model 3                                                                        |
| <b>S<sub>I</sub></b> = Inert soluble organic material (COD)                                                    |
| <b>S<sub>s</sub></b> = Readily biodegradable organic substrates (COD)                                          |
| <b>S<sub>NH4</sub></b> = Ammonium plus ammonia nitrogen ( $\text{NH}_4^+\text{-N} + \text{NH}_3\text{-N}$ )    |
| <b>S<sub>NOx</sub></b> = Nitrate plus nitrite nitrogen ( $\text{NO}_3^- \text{-N} + \text{NO}_2^- \text{-N}$ ) |
| <b>X<sub>I</sub></b> = Inert particulate organic material (COD)                                                |
| <b>X<sub>s</sub></b> = Slowly biodegradable substrates (COD)                                                   |
| <b>X<sub>H</sub></b> = Heterotrophic organisms (COD)                                                           |
| <b>X<sub>A</sub></b> = Nitrifying organisms (COD)                                                              |
| <b>X<sub>STO</sub></b> = A cell internal storage product of heterotrophic organisms (COD)                      |

**SM Table S2. Hypothesis on COD partition**

| <b>COD fraction</b>    | <b>Percentage %</b> | <b>Value mg/L</b> |
|------------------------|---------------------|-------------------|
| <b>X<sub>I</sub></b>   | 43.2                | 293.0             |
| <b>X<sub>s</sub></b>   | 49.3                | 334.5             |
| <b>S<sub>s</sub></b>   | 5.3                 | 35.9              |
| <b>S<sub>s</sub></b>   | 2.2                 | 14.6              |
| <b>X<sub>H</sub></b>   | 0.0                 | 0.0               |
| <b>X<sub>A</sub></b>   | 0.0                 | 0.0               |
| <b>X<sub>STO</sub></b> | 0.0                 | 0.0               |

**SM Table S3.** Technical Data of Sanitaire® Silver Series II Diffusers

| Disc materials                      | Specially blended high-grade EPDM |
|-------------------------------------|-----------------------------------|
| Disc diameter                       | 178 mm                            |
| Effective surface area              | 0.024 m <sup>2</sup>              |
| Orifice size                        | 5 mm                              |
| Airflow range per disc              | 0.8 -6.8 Nm <sup>3</sup> /h       |
| Standard Oxygen transfer efficiency | 6-8% per m submergence            |
| Standard Oxygen Efficiency          | 2.5 -6 kg O <sub>2</sub> /kWh     |

**SM Table S4.** Details concerning the outputs of the used ASM3

|                       | Scenario 0 | Scenario 1 | Scenario 2 | Scenario 3 |         |
|-----------------------|------------|------------|------------|------------|---------|
|                       | aerobic    | aerobic    | aerobic    | anoxic     | aerobic |
| FSS mg/L              | 1,380      | 1,380      | 529        | 529        | 529     |
| X <sub>s</sub> mg/L   | 220        | 220        | 105        | 129        | 87      |
| S <sub>s</sub> mg/L   | 0.26       | 0.26       | 0.24       | 0.7        | 0.14    |
| X <sub>i</sub> mg/L   | 6,320      | 6,320      | 3,600      | 3,470      | 3,440   |
| Total sN mg/L         | 39         | 39         | 44         | 27         | 25      |
| X <sub>H</sub> mg/L   | 940        | 940        | 548        | 612        | 621     |
| X <sub>A</sub> mg/L   | 36         | 36         | 38         | 57         | 58      |
| X <sub>STO</sub> mg/L | 151        | 151        | 82         | 109        | 91      |

## 1. Field oxygen transfer rate equation

$$OTR_f = SOTR \left[ \frac{\tau \beta \omega C_{\infty 20}^* - C}{C_{\infty 20}^*} \right] [(\theta)^{T-20}] \alpha F$$

*SM Equation S1*

Where:

- $C$  = average dissolved oxygen concentration within the process water volume, mg/L;
- $OTR_f$  = field oxygen transfer rate estimated for the system operating under process conditions at an average dissolved oxygen concentration,  $C$ , and temperature,  $T$ , kg  $O_2$  /h;
- $SOTR$  = oxygen transfer rate under standard conditions (20°C, 1 atm,  $C = 0$  mg/L), kg  $O_2$ /h;
- $T$  = field temperature;
- $C_{st}^*$  = dissolved oxygen surface saturation concentration at operating temperature, mg/L;
- $C_{s20}^*$  = dissolved oxygen surface saturation concentration at standard temperature (20°C) mg/L;
- $\tau$  = temperature correction factor =  $C_{st}^* / C_{s20}^*$ ;
- $\beta$  = relative DO saturation to clean water =  $C_{wastewater}^* / C_{tap\ water}^*$ ;
- $P_b$  = barometric pressure at test site (kPa);
- $P_s$  = standard barometric pressure (101.325 kPa);
- $\omega$  = pressure correction factor =  $P_b / P_s$ ;
- $d_e$  = mid-depth correction factor; (0.40);
- $D_f$  = depth of diffusers in basins, m;
- $C_{\infty,20}^*$  = saturated dissolved oxygen value at sea level and standard temperature (20°C) for diffused aeration, mg/L. It is higher than  $C_{st}$  as it is affected by oxygen transfer from bubbles under pressure in the water column. The value of  $C_{\infty,20}^*$  can be estimated using the following equation:

$$C_{\infty,20}^* = C_{s,20}^* \times \left[ 1 + d_e \left( \frac{D_f}{P_s} \right) \right]$$

*SM Equation S2*

- $\theta$  = empirical temperature correction factor, 1.024;
- $\alpha$  = relative oxygen transfer rate in process water versus clean water ( $K_{La,20(wastewater)} / K_{La,20(tap\ water)}$ );
- $F$  = fouling factor.

## 2. Blower – Power required for adiabatic compression

$$P_w = \frac{wRT_1}{28.97 n e} \times \left[ \left( \frac{p_2}{p_1} \right)^n - 1 \right]$$

*SM Equation S3*

Where

- $P_w$  = power requirement by blowers (kW);
- $w$  = weight of air flowrate (kg/s);
- $R$  = universal gas constant.  $R = 8.314$  (J/mole K);
- $T_1$  = air absolute inlet temperature (K);
- $p_1$  = air absolute inlet pressure (atm);
- $p_2$  = air absolute outlet pressure (atm);
- $n = (k - 1)/k$  where  $k$  is the specific heat ratio.  $k = 1.395$ ;
- $28.97$  = molecular weight of dry air;
- $e$  = blowers efficiency.

### Reference

Metcalf & Eddy Inc., Tchobanoglous, G.; Burton, F.L.; Tsuchihashi, R.; Stensel, H.D. Wastewater Engineering: Treatment and Resource Recovery. 5th ed. New York, NY: McGraw-Hill Professional, 2013. ISBN-10:9780073401188



**SM Figure S1a. Scenario 0** Process parameters, a function of  $Q_{was}$  (WAS flow rate) and  $Q_{air}$  (air flow rate)

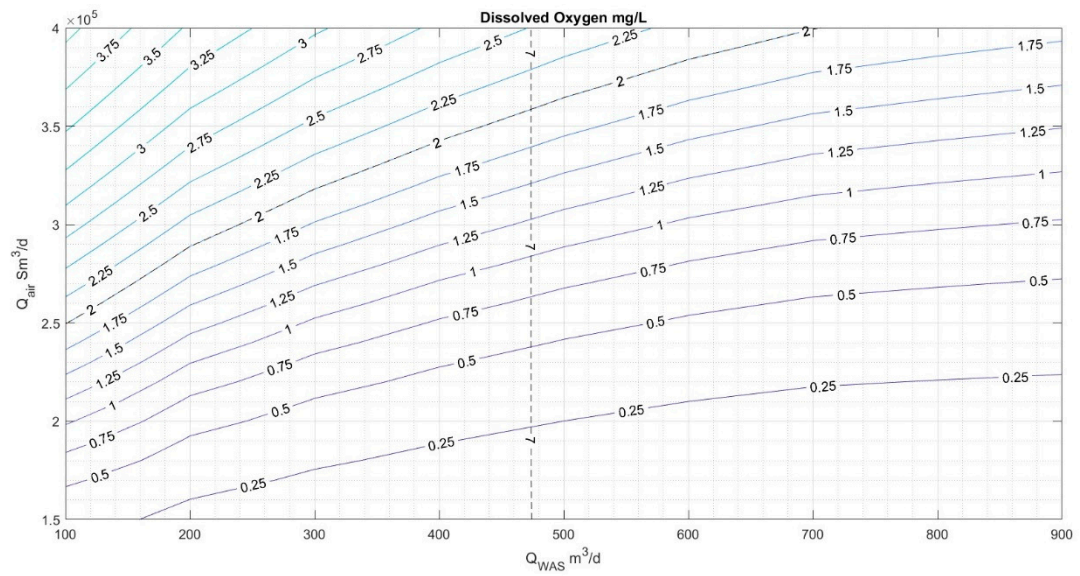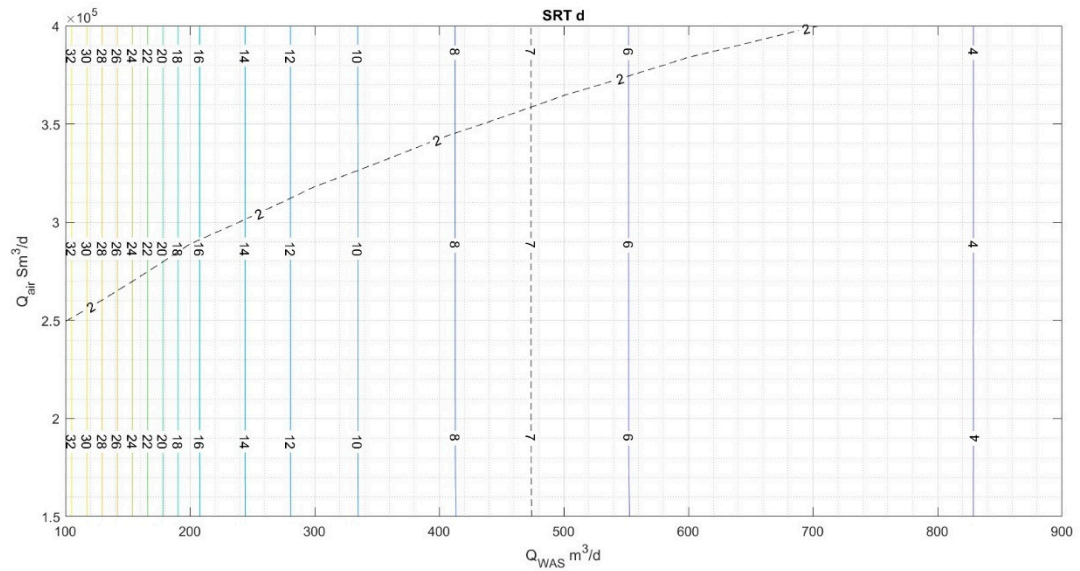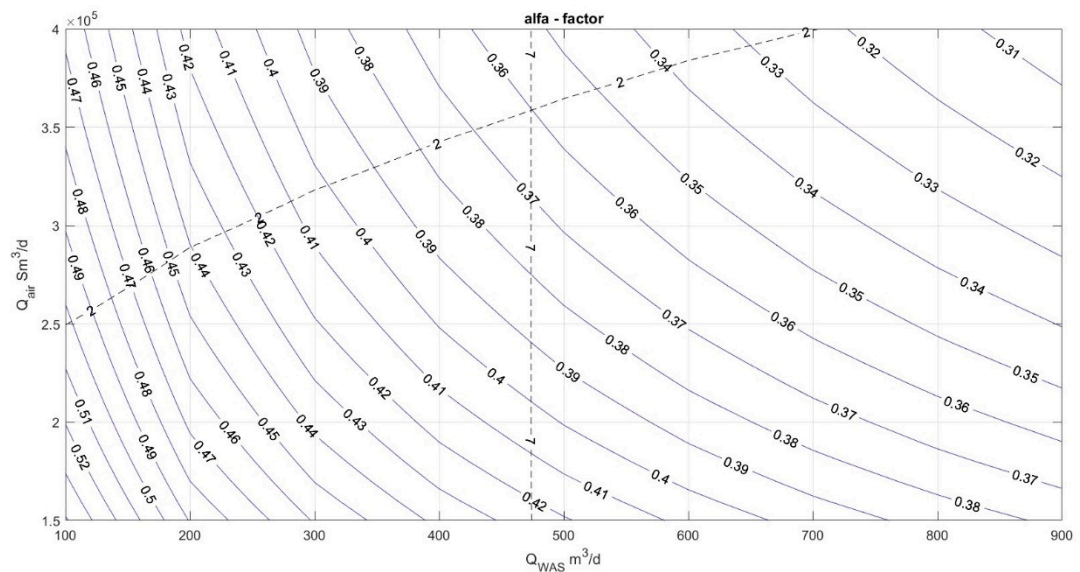

**SM Figure S1b. Scenario 0** Process parameters, a function of  $Q_{was}$  (WAS flow rate) and  $Q_{air}$  (air flow rate)

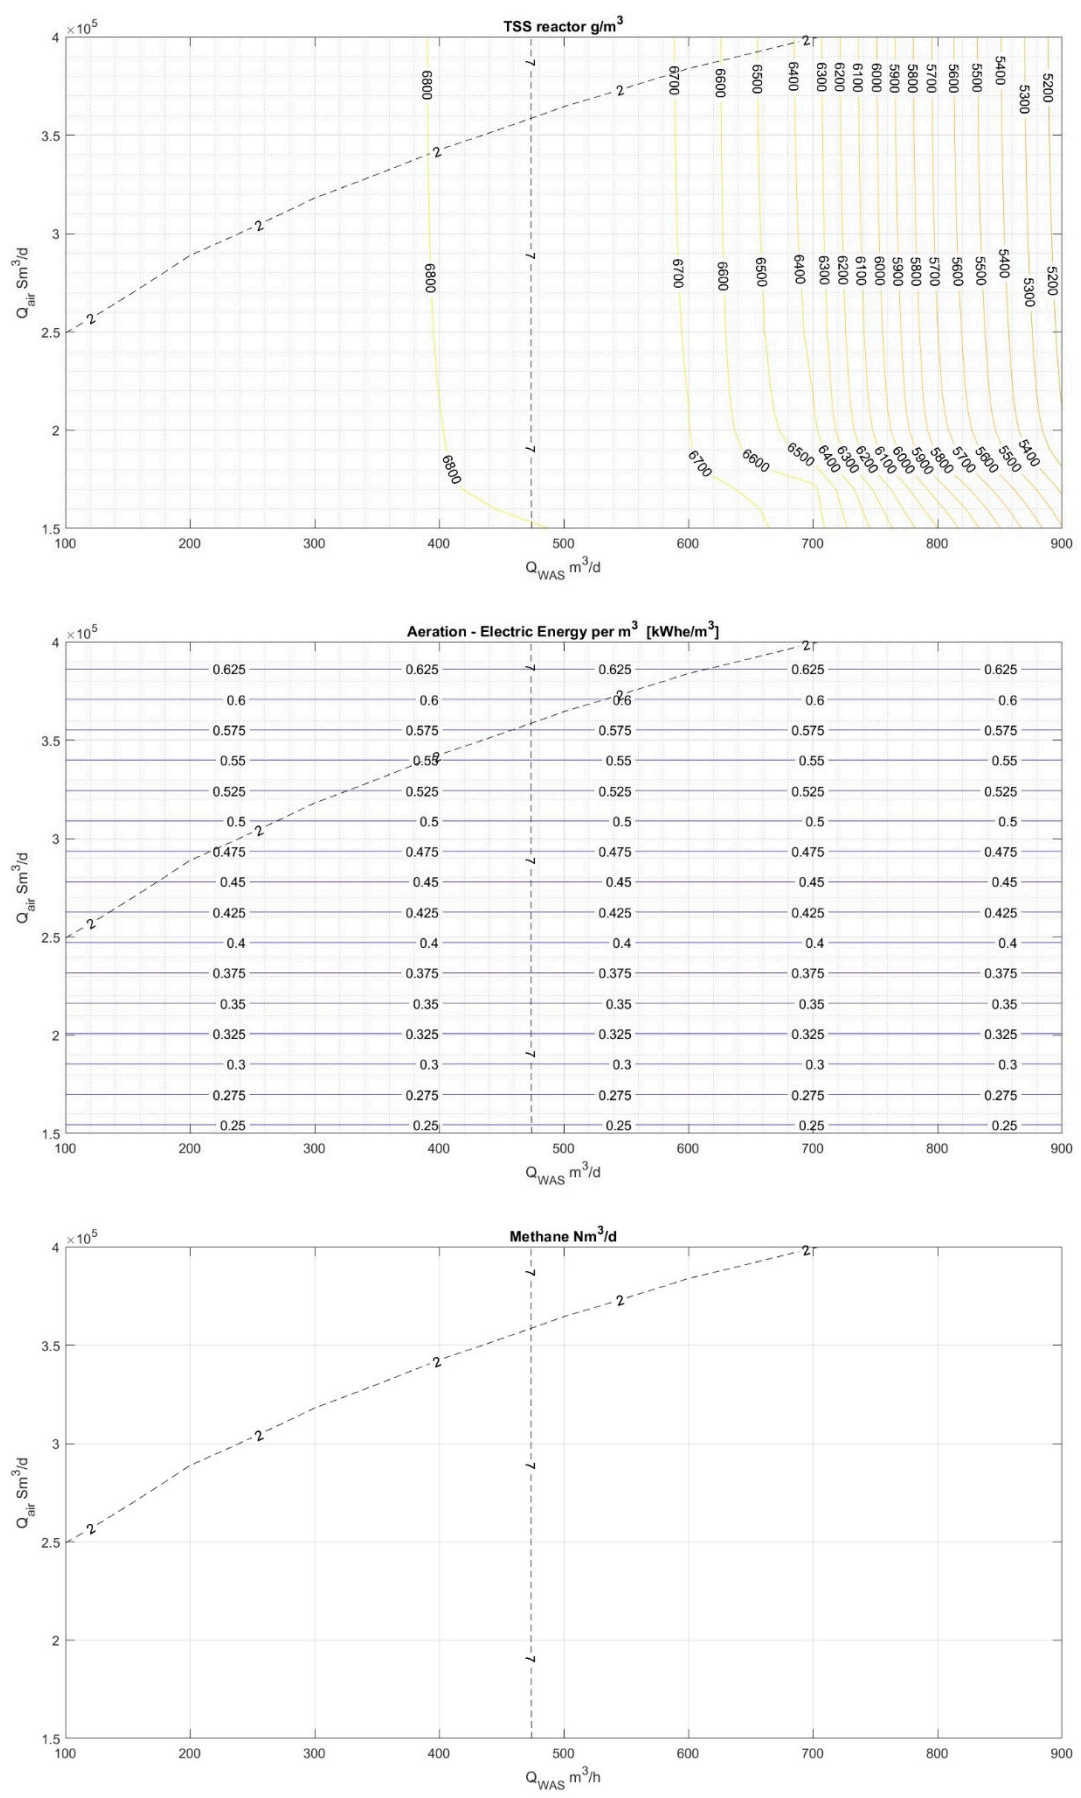



SM Figure S1c. Scenario 0 Process parameters, a function of  $Q_{was}$  (WAS flow rate) and  $Q_{air}$  (air flow rate)

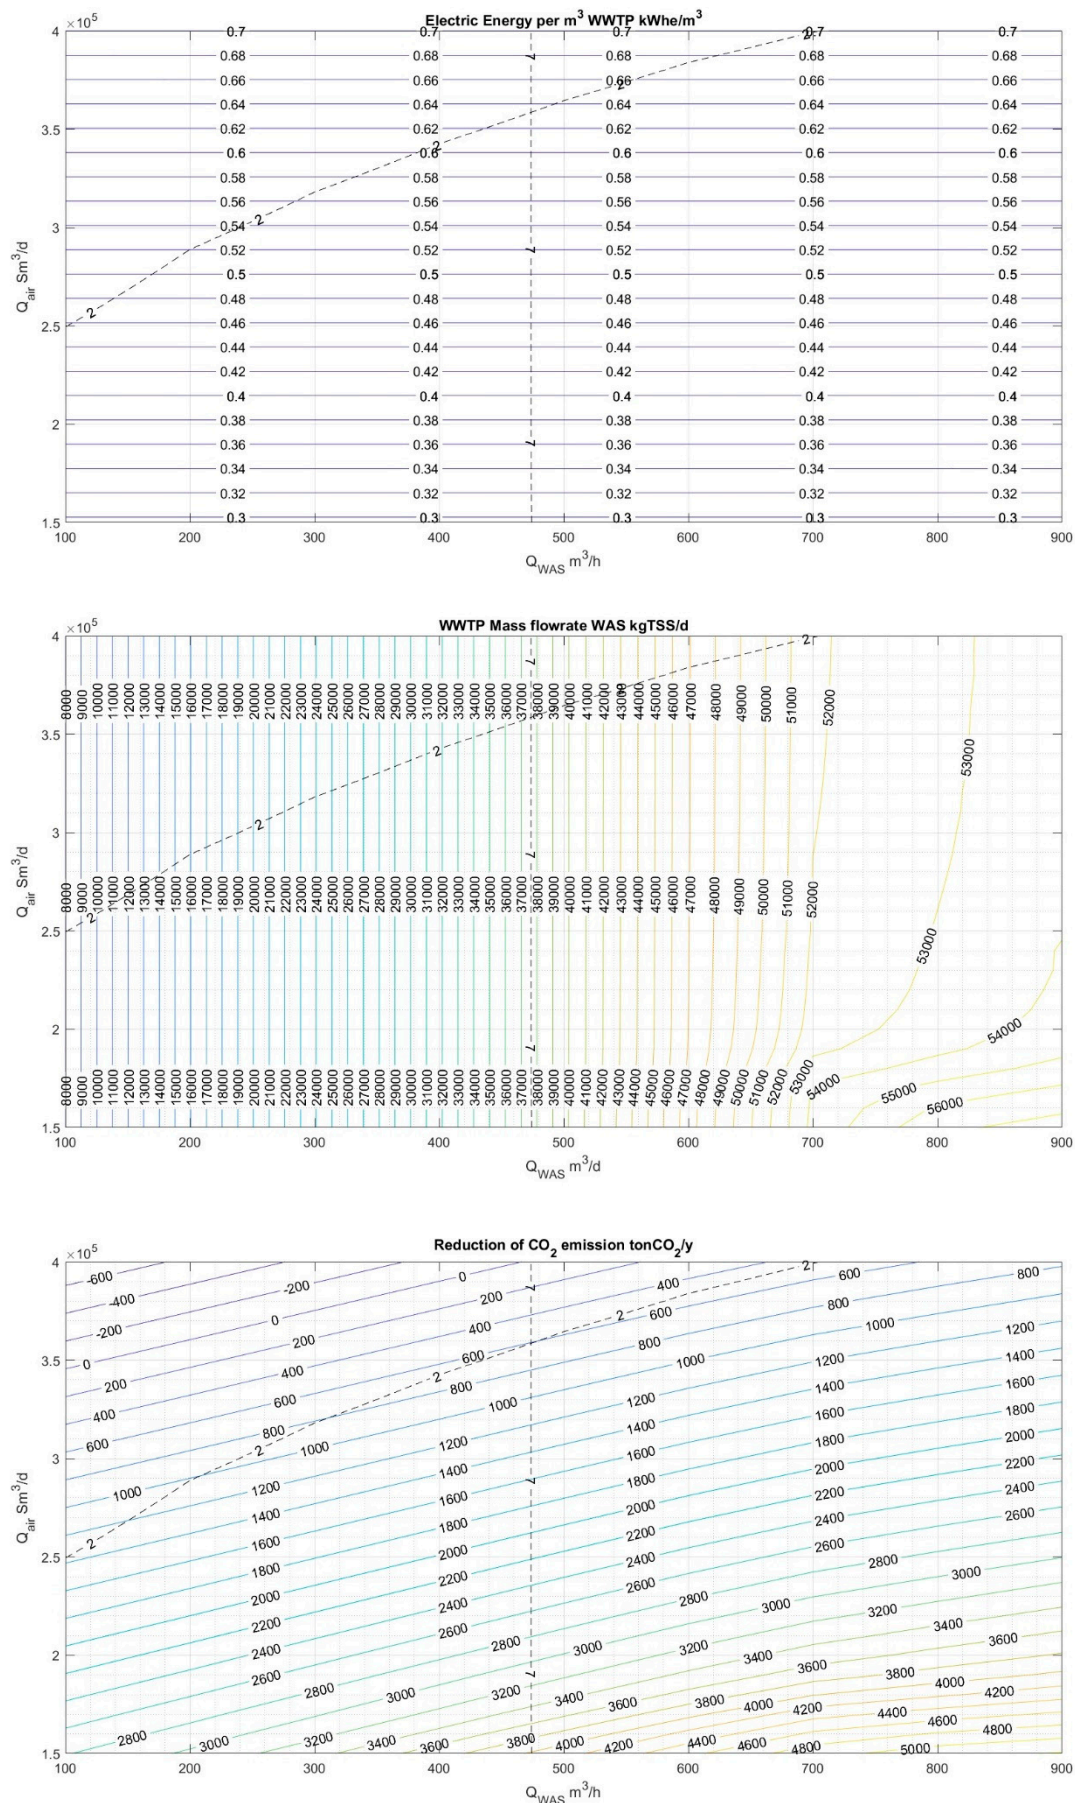



SM Figure S2a. Scenario 1 Process parameters, a function of  $Q_{WAS}$  (WAS flow rate) and  $Q_{air}$  (air flow rate)

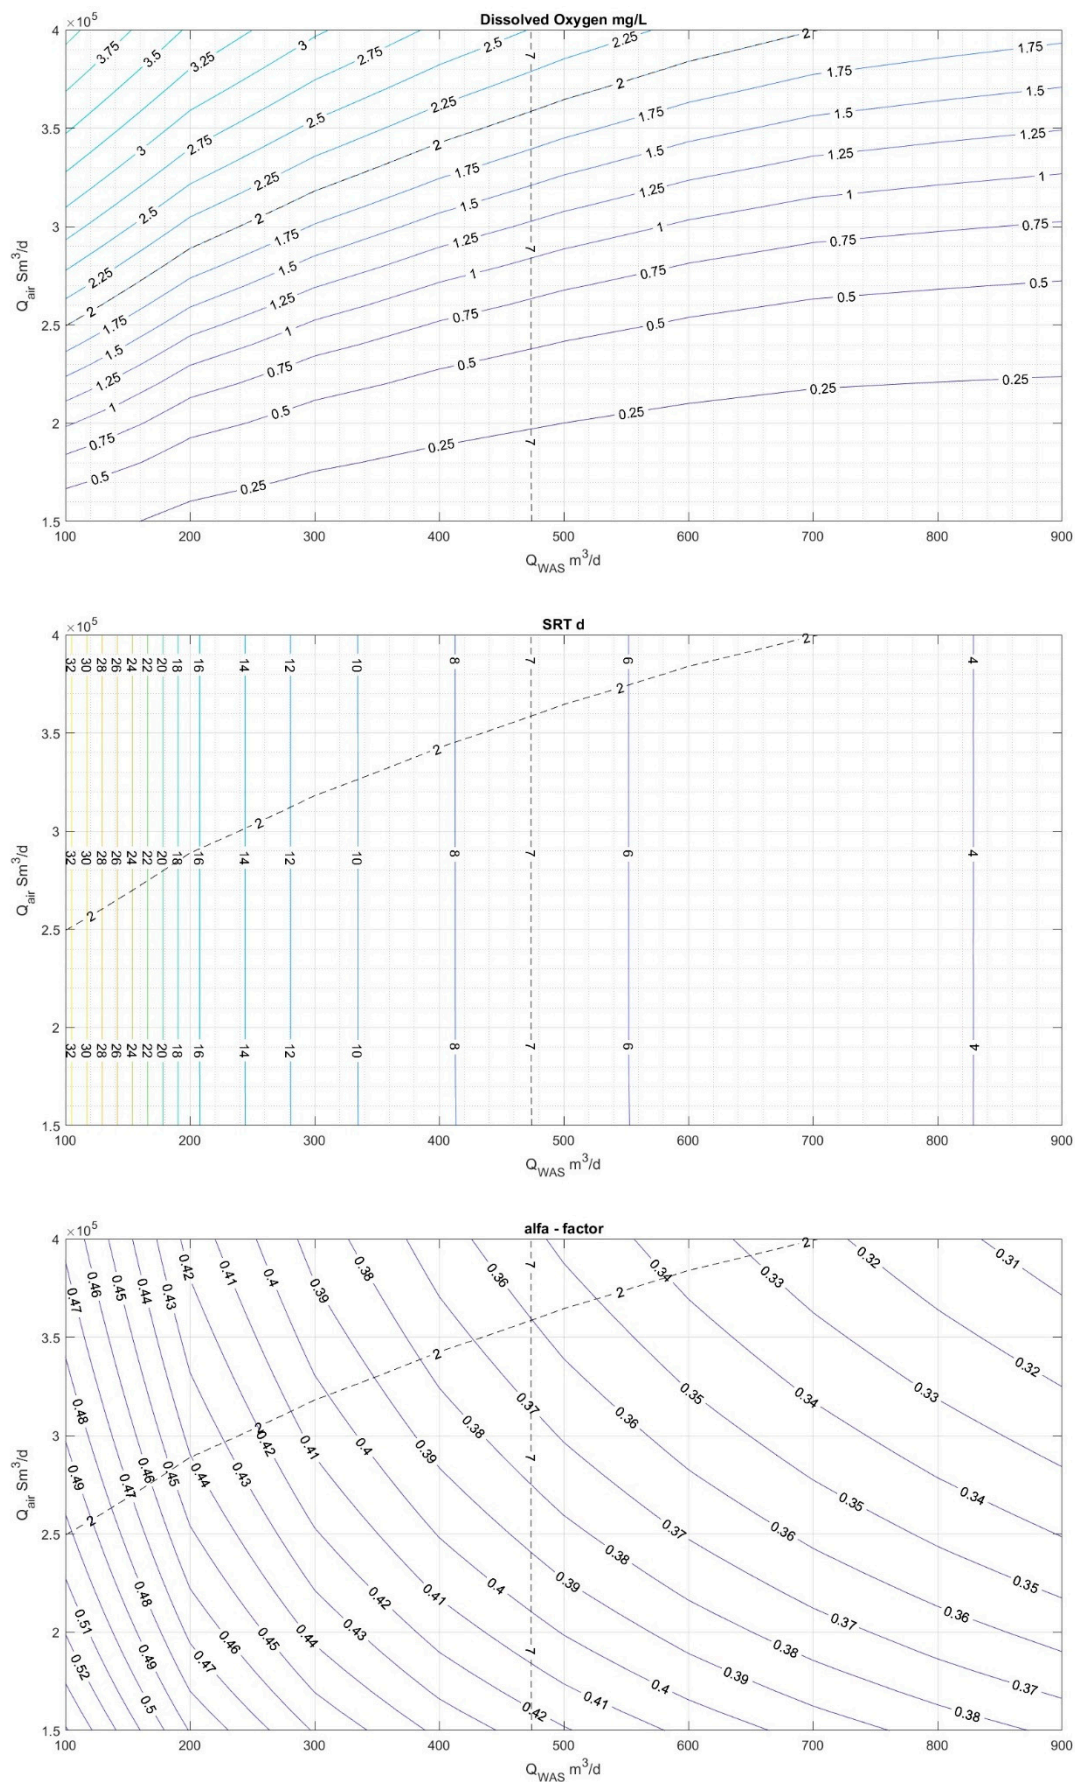

SM Figure S2b. Scenario 1 Process parameters, a function of Q<sub>was</sub> (WAS flow rate) and Q<sub>air</sub> (air flow rate)

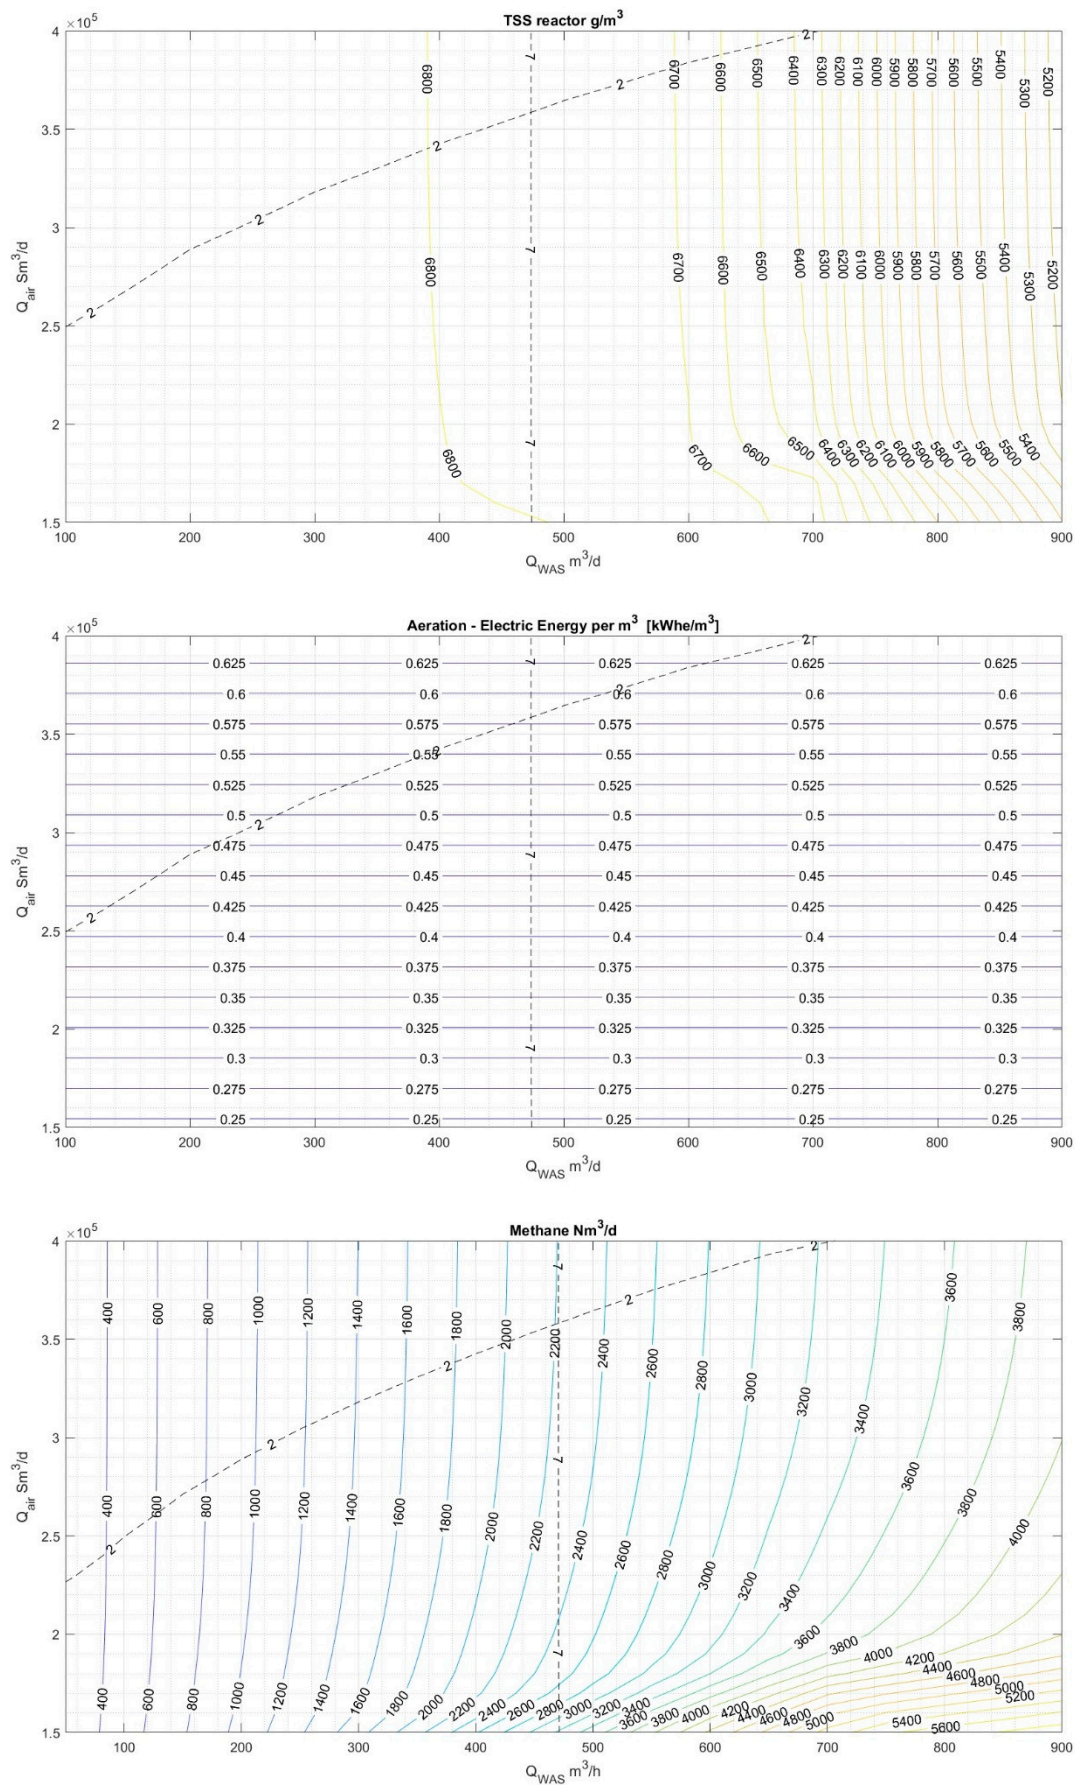



**SM Figure S2c. Scenario 1. Process parameters, a function of  $Q_{was}$  (WAS flow rate) and  $Q_{air}$  (air flow rate)**

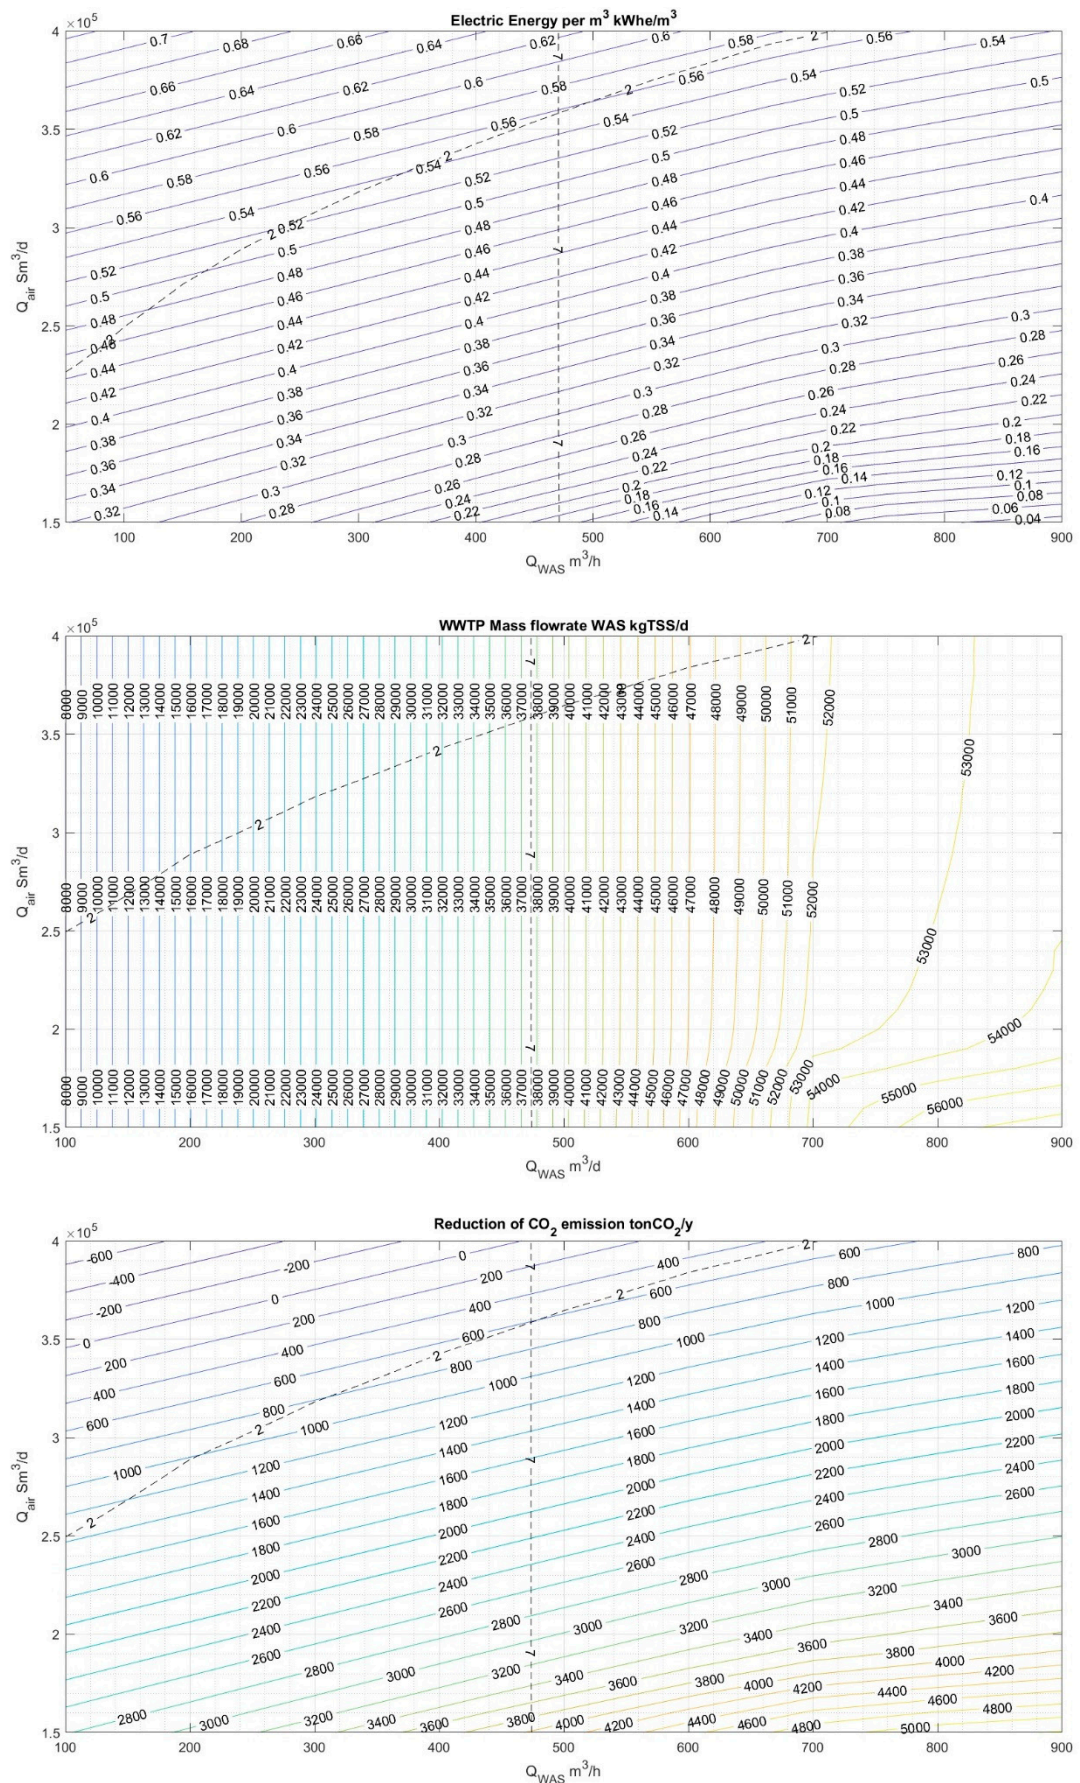

SM Figure S3a. Scenario 2. Process parameters, a function of  $Q_{WAS}$  (WAS flow rate) and  $Q_{air}$  (air flow rate)

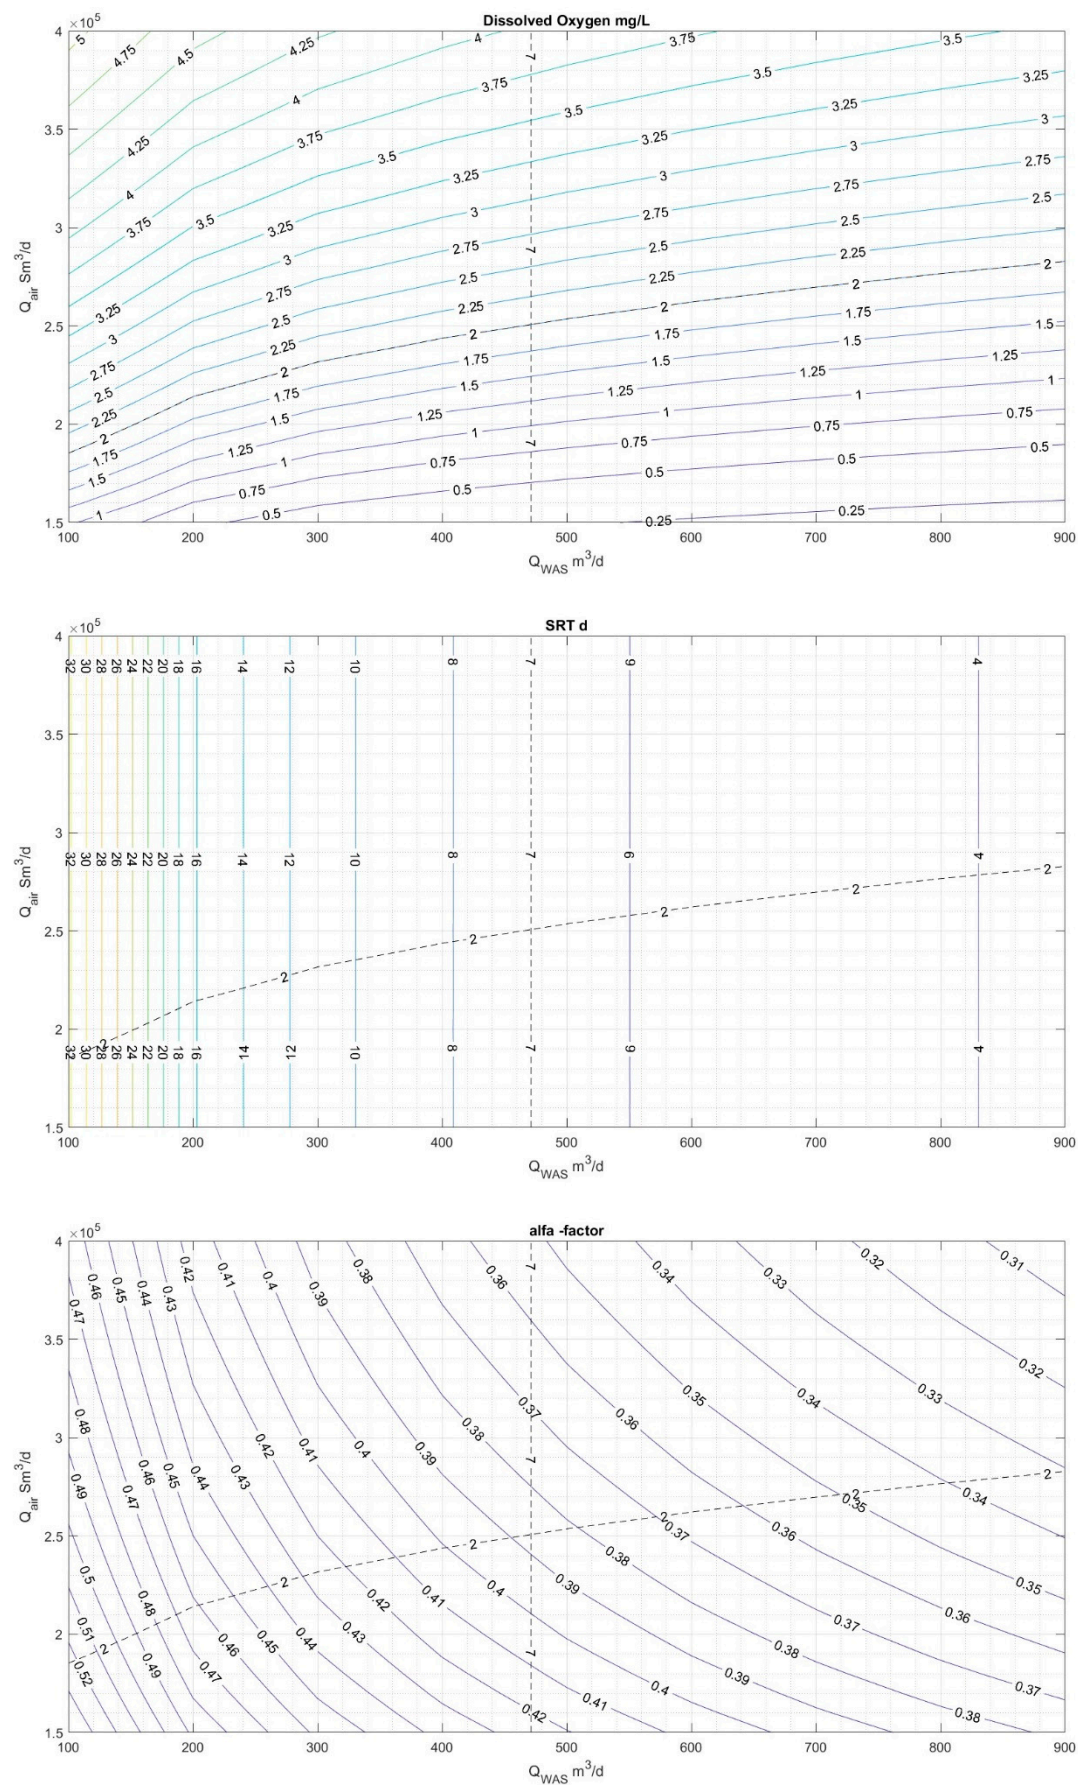



SM Figure S3b. Scenario 2. Process parameters, a function of  $Q_{was}$  (WAS flow rate) and  $Q_{air}$  (air flow rate)

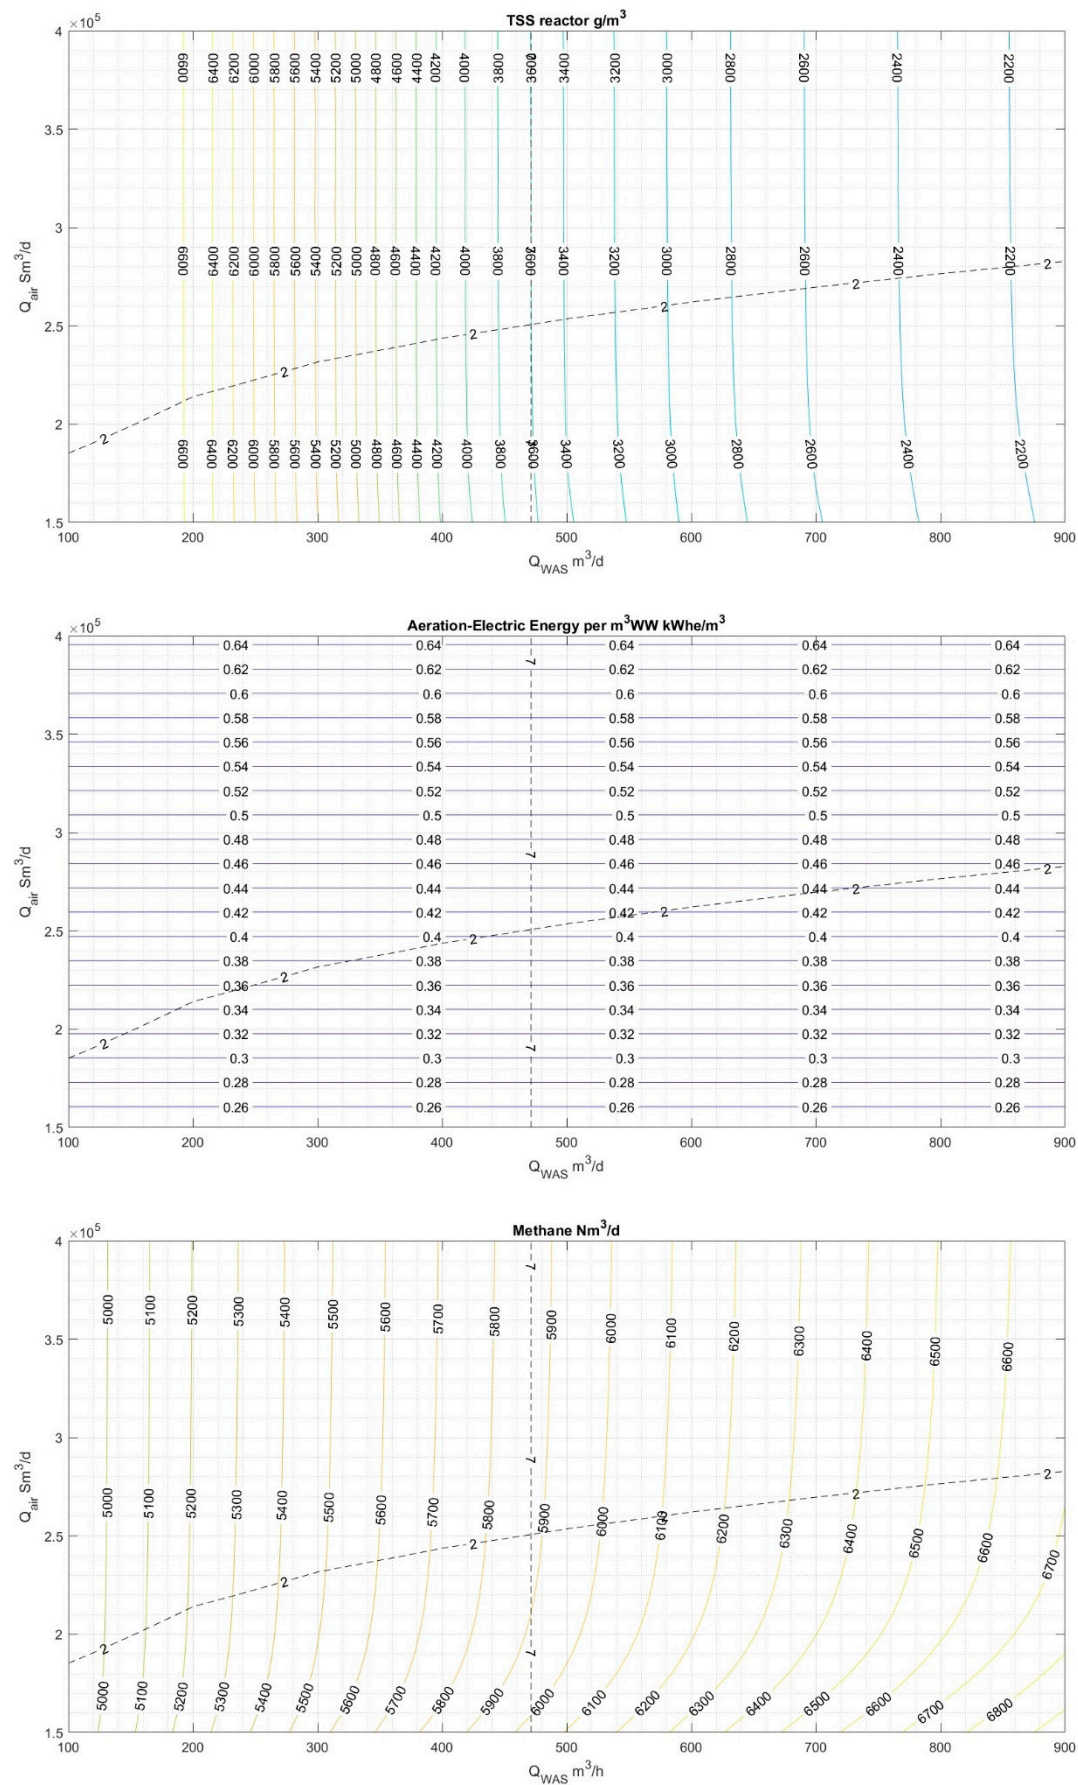

SM Figure S3c. Scenario 2. Process parameters, a function of  $Q_{was}$  (WAS flow rate) and  $Q_{air}$  (air flow rate)

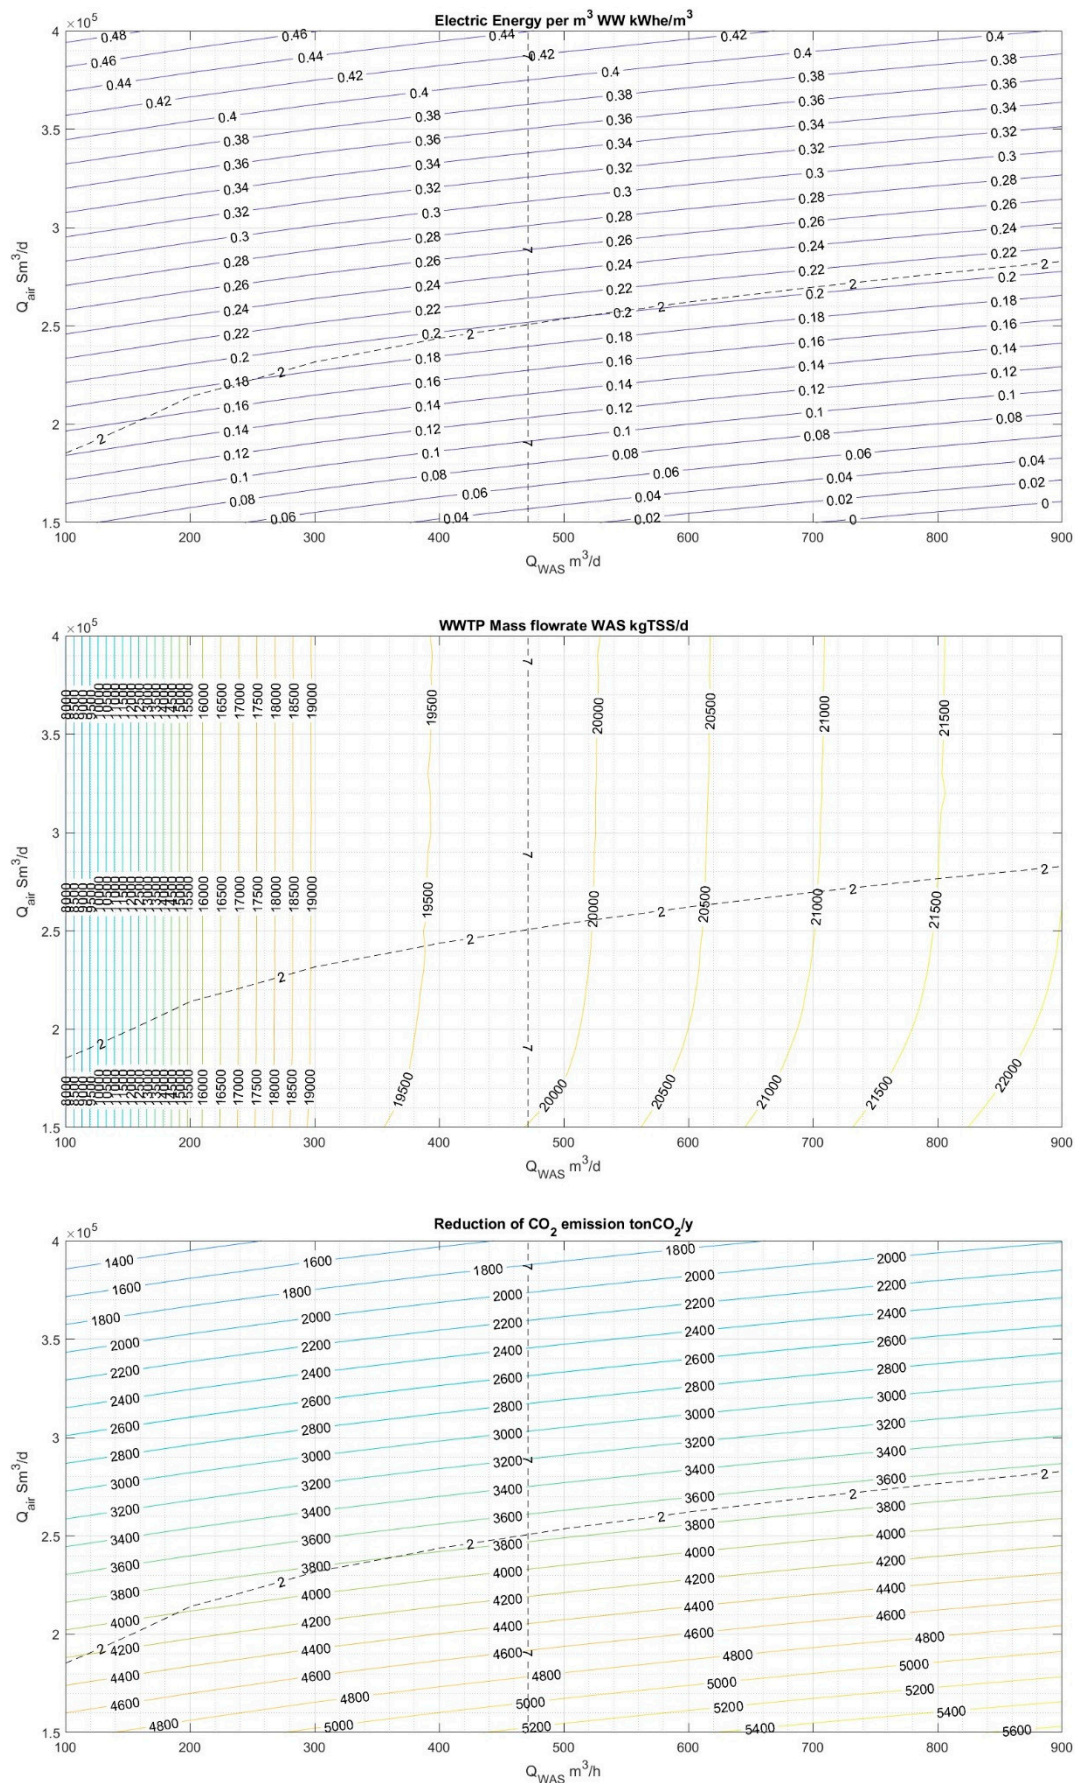



SM Figure S4a. Scenario 3. Process parameters, a function of  $Q_{WAS}$  (WAS flow rate) and  $Q_{air}$  (air flow rate)

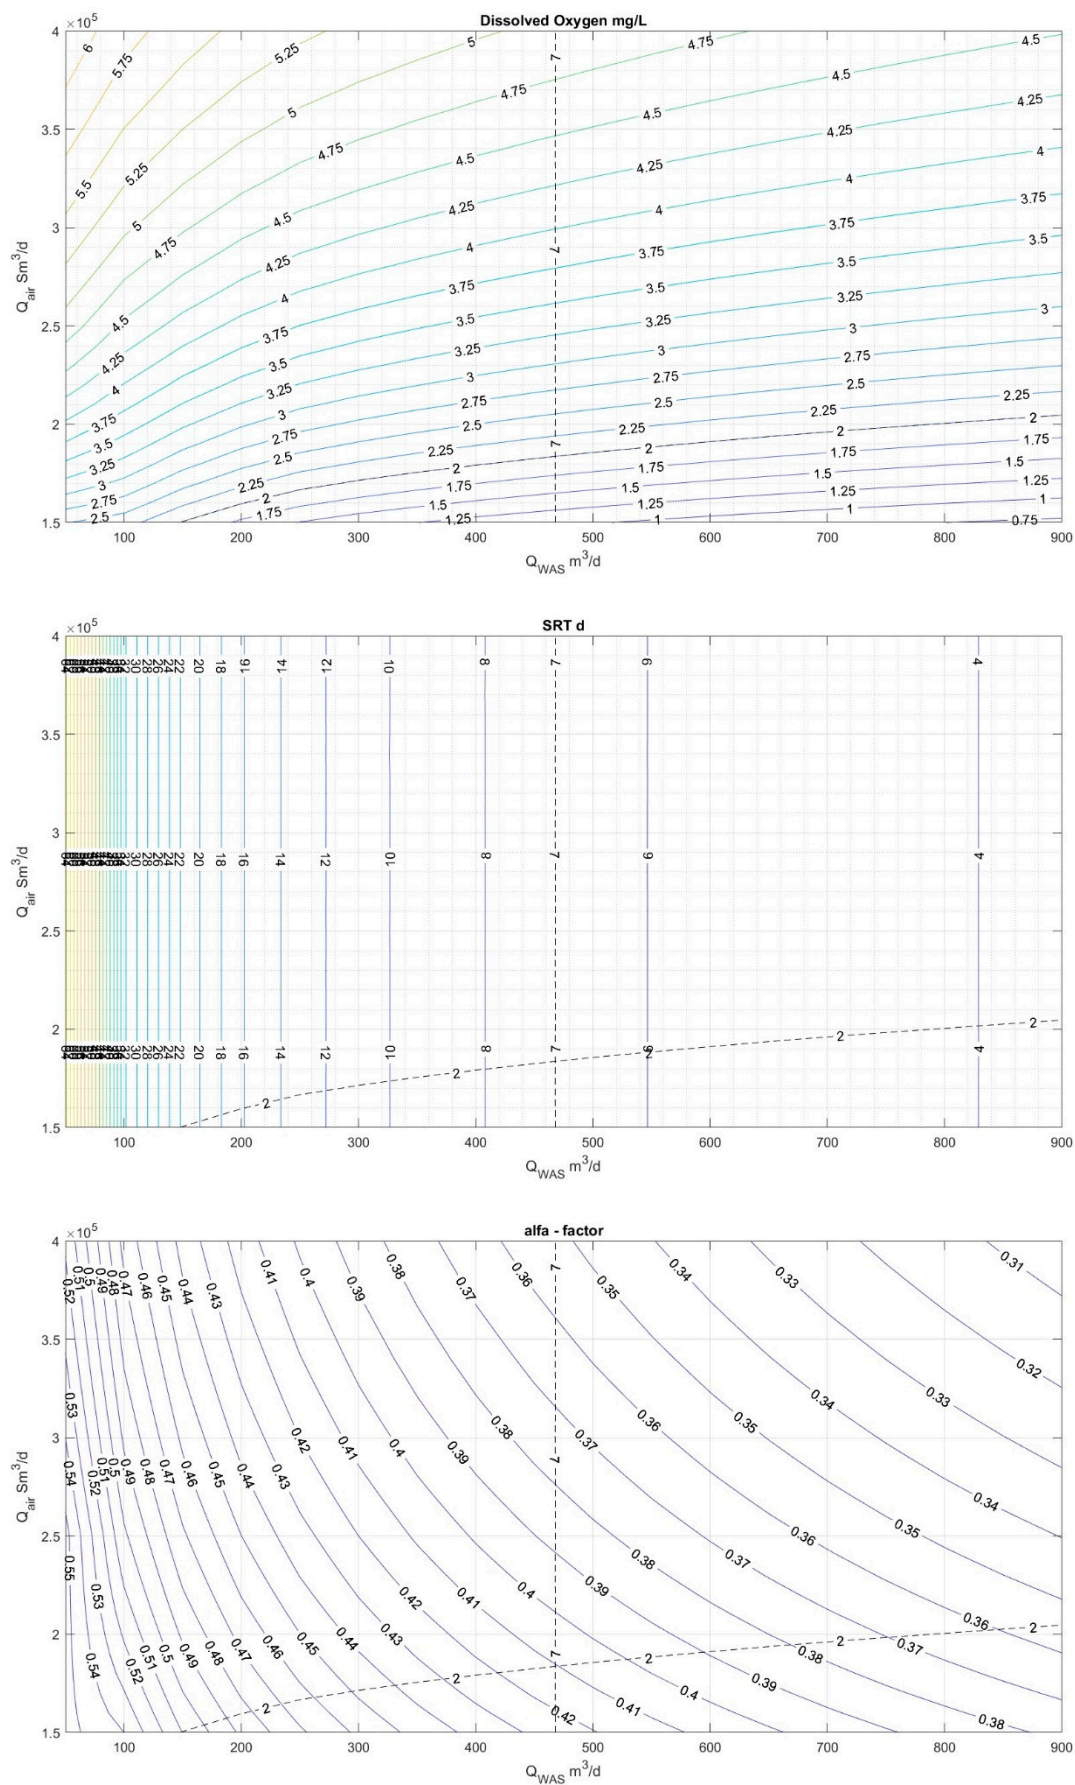

**SM Figure S4b.** Scenario 3. Process parameters, a function of  $Q_{WAS}$  (WAS flow rate) and  $Q_{air}$  (air flow rate)

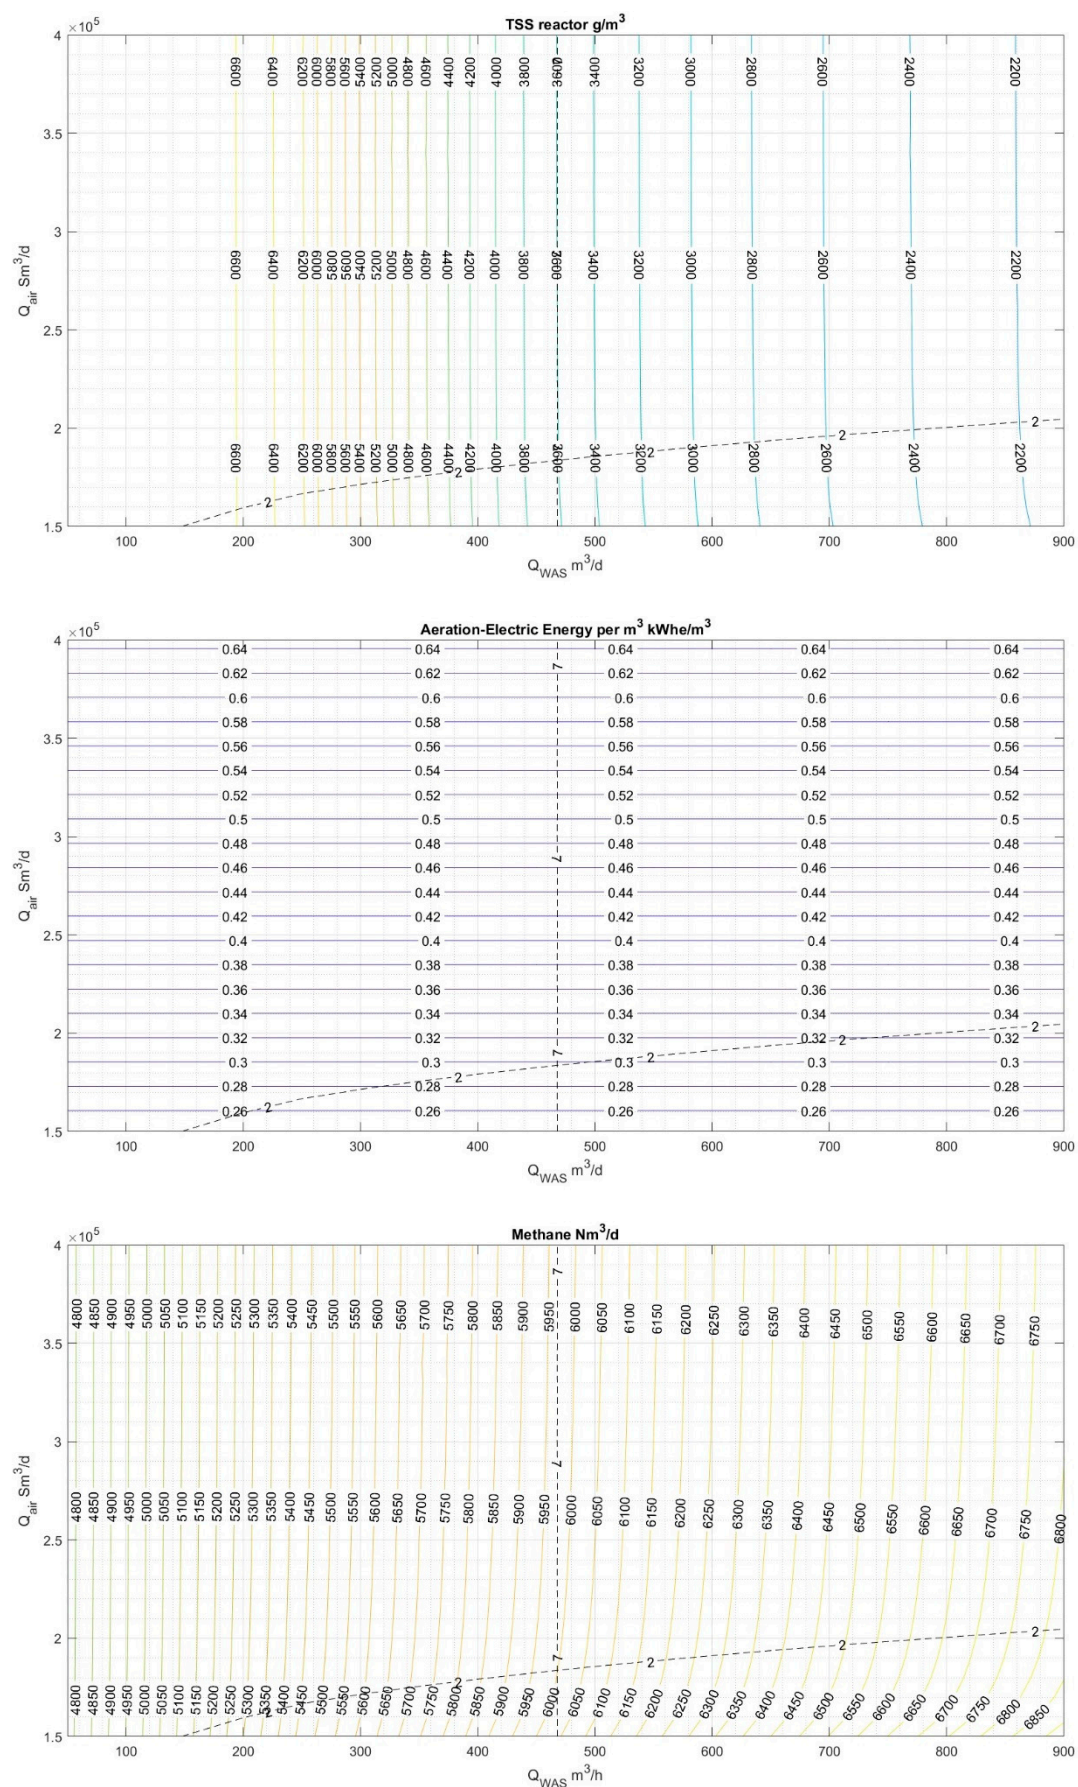



SM Figure S4c. Scenario 3. Process parameters, a function of  $Q_{was}$  (WAS flow rate) and  $Q_{air}$  (air flow rate)

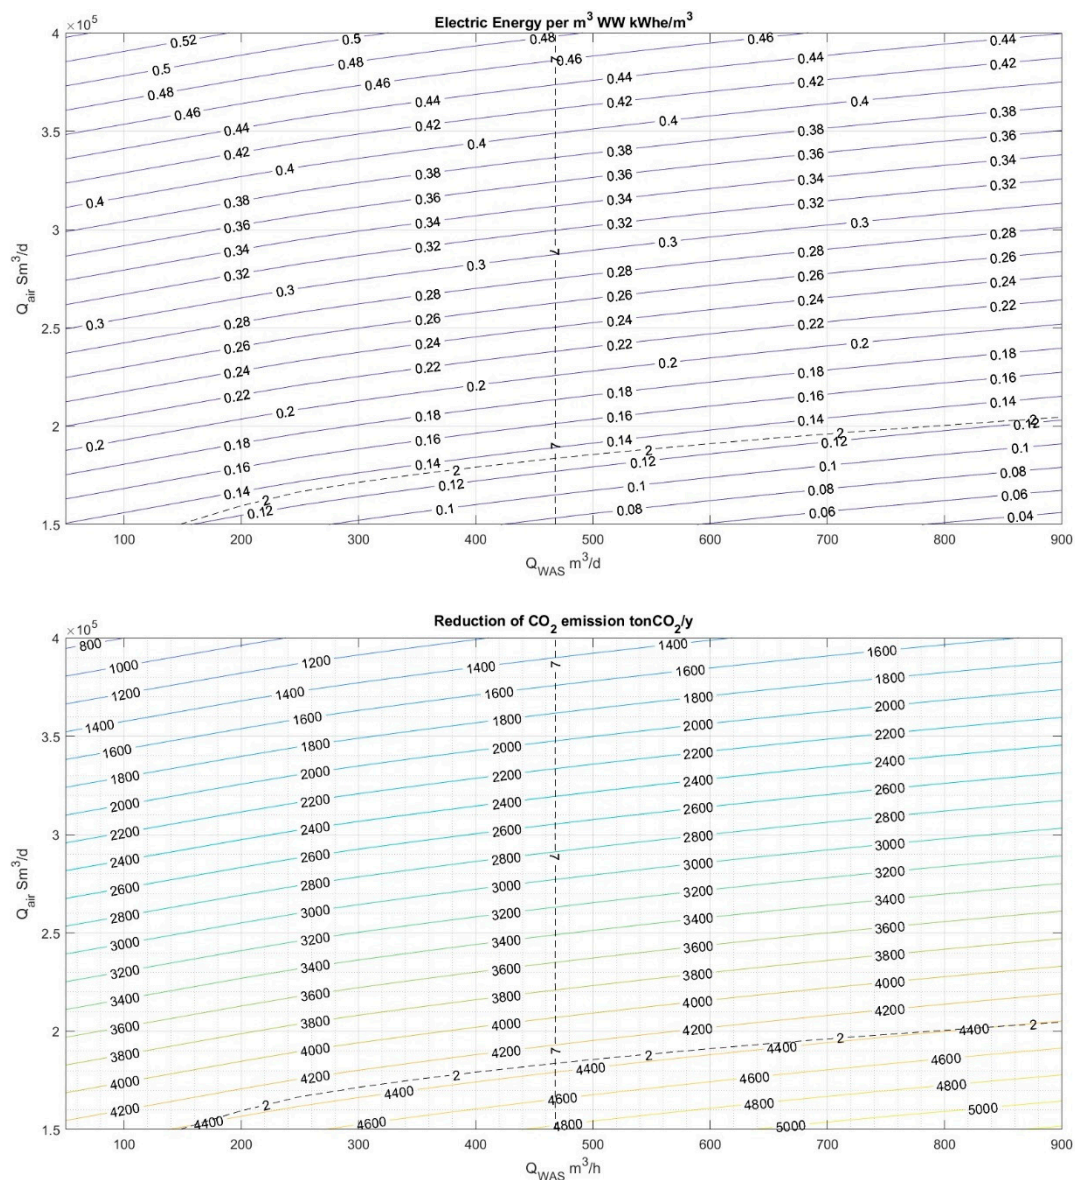

Supplement: s1 [file s1]
